# Supplementary material
Source: PubMed Central journal article supplement (PMC3563885)
Supplement: supp_120138_hyper-jacoby-1-at.pdf [file supp_120138_hyper-jacoby-1-at.pdf]

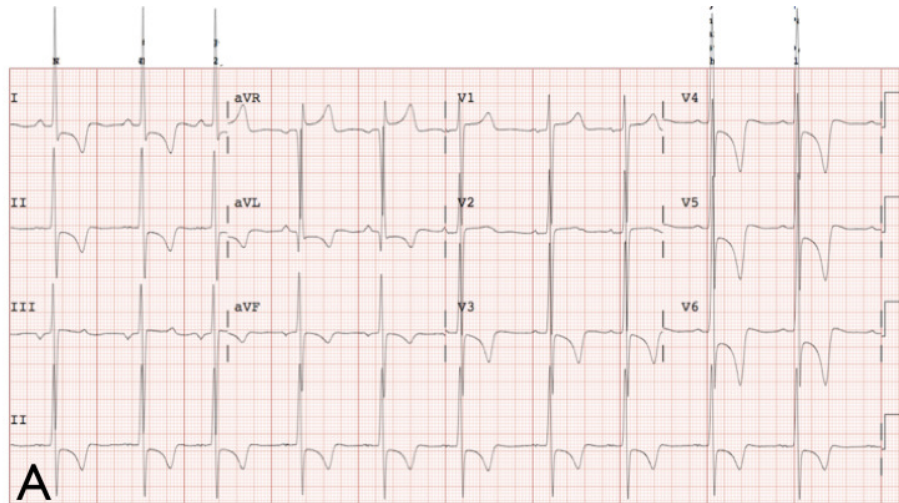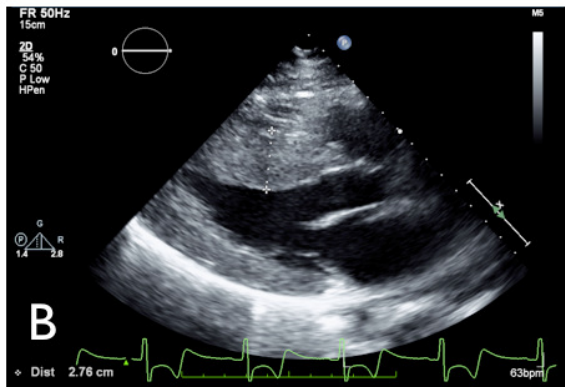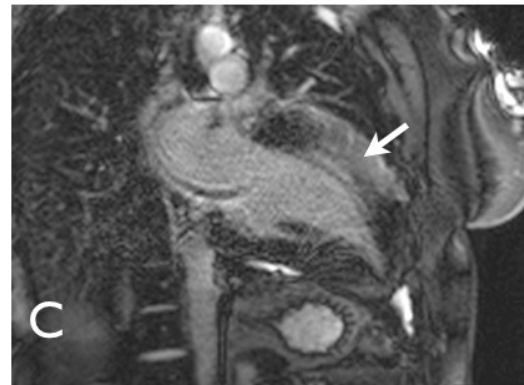

**Appendix 1 (as supplied by the authors):** Images obtained from a patient with hypertrophic cardiomyopathy. (A) 2-D echocardiograph, parasternal long axis view showing asymmetric septal hypertrophy (2.8 cm). (B) Electrocardiogram showing diffuse T-wave abnormalities predominantly in the anterolateral leads with left ventricular hypertrophy. (C) Magnetic resonance image with late gadolinium enhancement in the mid and basilar anterior wall and anteroseptum (arrow).
