# Supplementary material
Source: PubMed Central journal article supplement (PMC3563885)
Supplement: supp_120138_hyper-jacoby-2-at.pdf [file supp_120138_hyper-jacoby-2-at.pdf]

**Appendix 2 (as supplied by the authors):** Phenocopies of hypertrophic cardiomyopathy and distinguishing characteristics

| HCM Phenocopies                | Differences from hypertrophic cardiomyopathy                                                                                                                                                                                                                                                                                                                                                                                                                                                                                                                                                                                                                                                                                   |
|--------------------------------|--------------------------------------------------------------------------------------------------------------------------------------------------------------------------------------------------------------------------------------------------------------------------------------------------------------------------------------------------------------------------------------------------------------------------------------------------------------------------------------------------------------------------------------------------------------------------------------------------------------------------------------------------------------------------------------------------------------------------------|
| Athlete's Heart <sup>1,2</sup> | <ul style="list-style-type: none"> <li>• Concentric LVH</li> <li>• LVH regresses with cessation of exercise</li> <li>• Cardiopulmonary exercise stress test, Echo parameters of diastolic function may help distinguish from HCM</li> </ul>                                                                                                                                                                                                                                                                                                                                                                                                                                                                                    |
| Fabry's Disease <sup>3</sup>   | <ul style="list-style-type: none"> <li>• X-linked recessive multisystem disease               <ul style="list-style-type: none"> <li>○ Cardiac manifestations include LVH, conduction defects, CAD, aortic and mitral regurgitation, aortic root dilatation</li> <li>○ Renal failure</li> <li>○ Stroke</li> <li>○ Skin manifestations: telangiectasias, angiokeratomas (typical locations include groin, hip and periumbilical regions)</li> </ul> </li> <li>• Diagnosis can be achieved by measurement of low alpha-galactosidase activity, endomyocardial biopsy or genetic testing</li> <li>• Enzyme replacement may alter the disease course</li> </ul>                                                                    |
| Amyloidosis <sup>4</sup>       | <ul style="list-style-type: none"> <li>• ECG is marked by low voltage; Echo may be characterized by LVH with increased echogenicity and decreased systolic function</li> <li>• AL Amyloid               <ul style="list-style-type: none"> <li>○ Multisystem disease caused by deposition of monoclonal light chains</li> </ul> </li> <li>• ATTR Amyloid; abnormal Tc pyrophosphate scan               <ul style="list-style-type: none"> <li>○ Due to autosomal dominant mutations in transthyretin characterized by neuropathy, cardiomyopathy or both</li> <li>○ Liver transplantation can be curative, however those with significant cardiac manifestations may require dual organ transplantation</li> </ul> </li> </ul> |
| Danon Disease <sup>5</sup>     | <ul style="list-style-type: none"> <li>• Characterized by deficiency of lysosomal-associated membrane protein 2 with severe cardiomyopathy and mild skeletal myopathy</li> <li>• Other clinical features can include mental retardation and ophthalmologic manifestations</li> <li>• Elevated creatine kinase or muscle biopsy can aid diagnosis</li> </ul>                                                                                                                                                                                                                                                                                                                                                                    |

|                                             |                                                                                                                                                                                                                                                                                                                                                                             |
|---------------------------------------------|-----------------------------------------------------------------------------------------------------------------------------------------------------------------------------------------------------------------------------------------------------------------------------------------------------------------------------------------------------------------------------|
|                                             | <ul style="list-style-type: none"> <li>• Limited treatment options; may progress to need for heart transplantation</li> </ul>                                                                                                                                                                                                                                               |
| Mitochondrial Cardiomyopathies <sup>6</sup> | <ul style="list-style-type: none"> <li>• Characterized by multisystem disease with possible manifestations including: <ul style="list-style-type: none"> <li>• Optic atrophy; pigmental retinopathy</li> <li>• Cardiomyopathy</li> <li>• CNS features</li> <li>• Peripheral Nervous System features including hypotonia, muscle weakness, neuropathy</li> </ul> </li> </ul> |
| Noonan Syndrome <sup>7</sup>                | <ul style="list-style-type: none"> <li>• Autosomal dominant disease</li> <li>• Can be characterized by short stature, pectus excavatum, hypertelorism, low set ears, pulmonic valve stenosis amongst other features</li> <li>• Abnormalities platelet function and clotting</li> </ul>                                                                                      |

## References

1. Pelliccia A, Maron BJ, Spataro A, et al. The upper limit of physiologic cardiac hypertrophy in highly trained elite athletes. *N Engl J Med* 1991;324:295-301.
2. Basavarajaiah S, Boraita A, Whyte G, et al. Ethnic differences in left ventricular remodeling in highly-trained athletes relevance to differentiating physiologic left ventricular hypertrophy from hypertrophic cardiomyopathy. *J Am Coll Cardiol* 2008;51:2256-62.
3. Wu JC, Ho CY, Skali H, et al. Cardiovascular manifestations of Fabry disease: relationships between left ventricular hypertrophy, disease severity, and alpha-galactosidase A activity. *Eur Heart J* 2010;31:1088-97.
4. Selvanayagam JB, Hawkins PN, Paul B, et al. Evaluation and management of cardiac amyloidosis. *J Am Coll Cardiol*. 2007;50:2101-10.
5. Maron BJ, Roberts WC, Arad M, et al. Outcome and phenotypic expression in LAMP2 cardiomyopathy. *JAMA*. 2009;301: 1253–1259.
6. DiMauro S, Schon EA. Mitochondrial respiratory-chain diseases. *N Engl J Med*. 2003; 348: 2656–68.
7. Romano AA, Allanson JE, Dahlgren J, et al. Noonan syndrome: clinical features, diagnosis, and management guidelines. *Pediatrics* 2010;126:746-59.
