# Supplementary material
Source: PubMed Central journal article supplement (PMC3563885)

[Type text]

**Appendix 4 (as supplied by the authors):** Determinants of Surgical v. Catheter Therapies for Septal Reduction

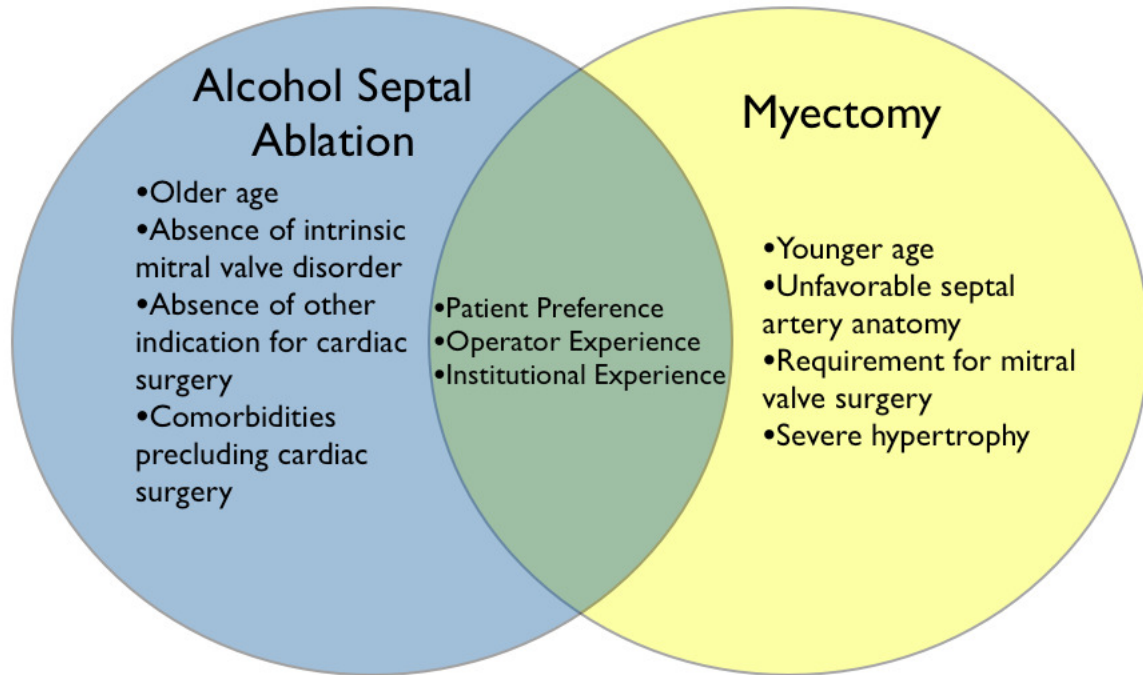

Supplement: supp_120138_hyper-jacoby-4-at.pdf [file supp_120138_hyper-jacoby-4-at.pdf]
